EDITORIAL

## *PLOS Pathogens* 2018 Reviewer and Editorial Board Thank You

PLOS and the *PLOS Pathogens* team want to sincerely thank all of our Editorial Board Members, Guest Editors, and Reviewers for the journal in 2018. Your contributions of time and expertise support your research community, advance scientific progress, and continue to make *PLOS Pathogens* a leader in its field. This past year, *PLOS Pathogens* received the assistance of 233 Editorial Board members, 264 Guest Editors, and 2,064 Reviewers, who handled 2,256 manuscripts that resulted in 579 publications ([Fig 1](#)).

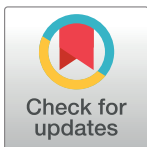

---

### OPEN ACCESS

**Citation:** (2019) *PLOS Pathogens* 2018 Reviewer and Editorial Board Thank You. *PLoS Pathog* 15(2): e1007649. <https://doi.org/10.1371/journal.ppat.1007649>

**Published:** February 27, 2019

**Copyright:** © 2019 The PLOS Pathogens Staff. This is an open access article distributed under the terms of the [Creative Commons Attribution License](#), which permits unrestricted use, distribution, and reproduction in any medium, provided the original author and source are credited.

**Data Availability Statement:** All relevant data are within the manuscript.

**Funding:** The author(s) received no specific funding for this work.

**Competing interests:** The authors have declared that no competing interests exist.

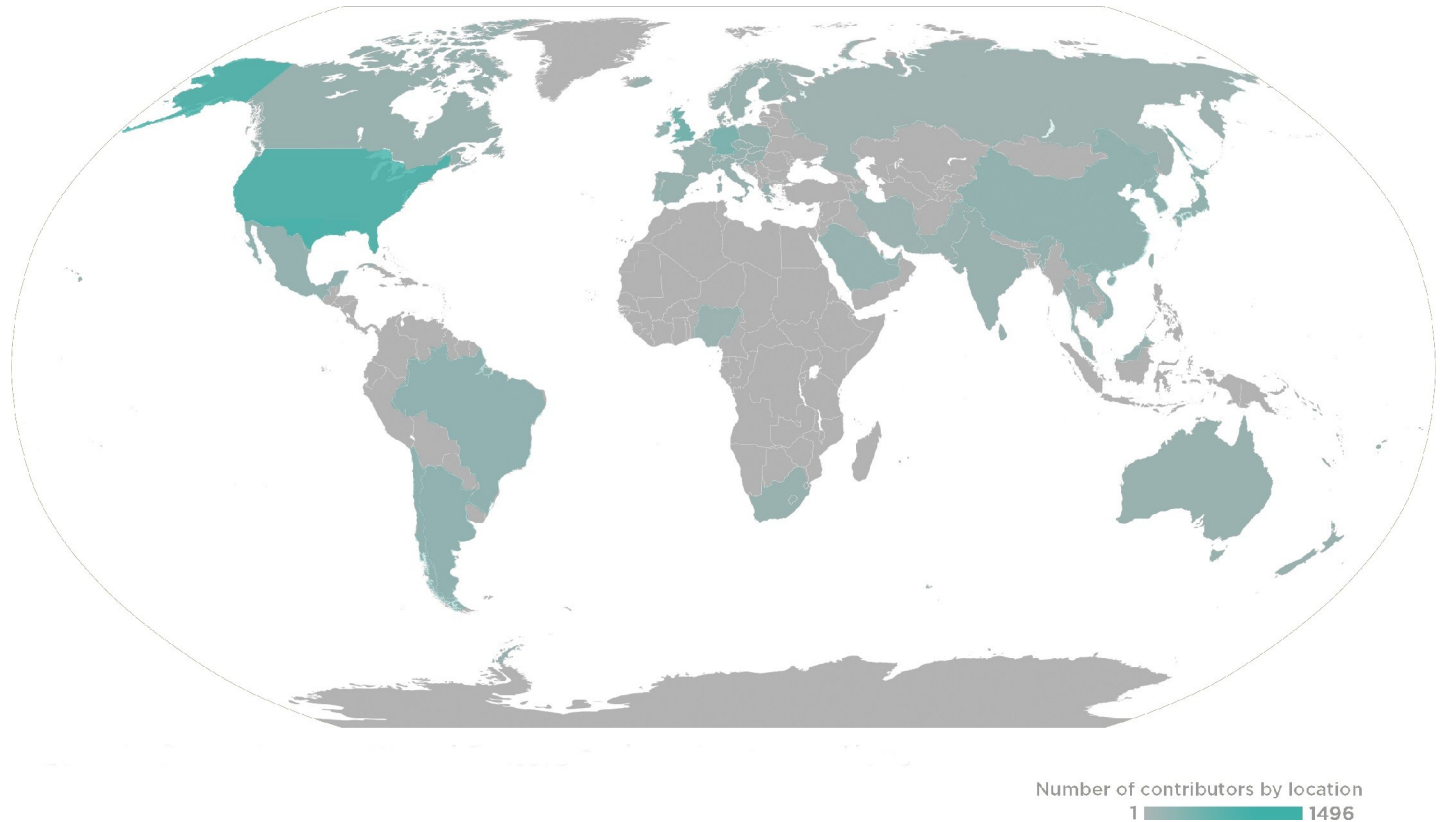

**Fig 1. 2018 *PLOS Pathogens* Global Editor and Reviewer locations.**

<https://doi.org/10.1371/journal.ppat.1007649.g001>

We're deeply grateful to all of our volunteers whose dedicated efforts support *PLOS Pathogens* and Open Science. Thank you all for your work!

## References

1. (2018) *PLOS Pathogens* 2017 Reviewer and Editorial Board Thank You. *PLoS Pathog* 14(3):e100695
2. (2017) *PLOS Pathogens* 2016 Reviewer and Editorial Board Thank You. *PLoS Pathog* 13(3): e1006278.
3. (2016) *PLOS Pathogens* 2015 Reviewer Thank You. *PLoS Pathog* 12(2):e1005497.
4. (2015) *PLOS Pathogens* 2014 Reviewer Thank You. *PLoS Pathog* 11(2):e1004748.
